# Supplementary material for: Spinel MgAl2O4 modification on LiCoO2 cathode materials with the combined advantages of MgO and Al2O3 modifications for high-voltage lithium-ion batteries
Source: Royal Society of Chemistry journal article supplement (doi:10.1039/c6ra27463c), 2017-01-01
Supplement: c6ra27463c1.pdf [file c6ra27463c1.pdf]

## Electronic Supplementary Information

### Spinel $\text{MgAl}_2\text{O}_4$ modification on $\text{LiCoO}_2$ cathode materials with the combined advantages of $\text{MgO}$ and $\text{Al}_2\text{O}_3$ modifications for high-voltage lithium-ion batteries

D.D. Liang<sup>a</sup>, H.F. Xiang<sup>a,\*</sup>, X. Liang<sup>a</sup>, S. Cheng<sup>c</sup>, C.H. Chen<sup>b</sup>

<sup>a</sup> School of Materials Science and Engineering, Hefei University of Technology, Anhui Hefei, 230009, PR China

Tel.: +86-551-62901457; fax: +86-551-62901362 E-mail: [hfxiang@hfut.edu.cn](mailto:hfxiang@hfut.edu.cn) (H.F. Xiang).

<sup>b</sup> CAS Key Laboratory of Materials for Energy Conversions, Department of Materials Science and Engineering, University of Science and Technology of China, Anhui Hefei 230026, China

<sup>c</sup> Instrumental Analysis Center, Hefei University of Technology, Hefei, Anhui 230009, PR China

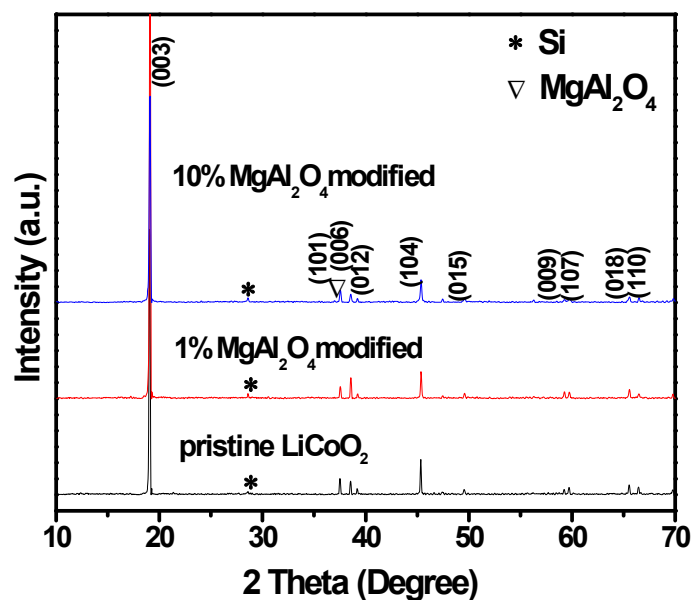

**Fig. S1** XRD patterns of the pristine  $\text{LiCoO}_2$  and 1%, 10%  $\text{MgAl}_2\text{O}_4$ -modified  $\text{LiCoO}_2$  samples

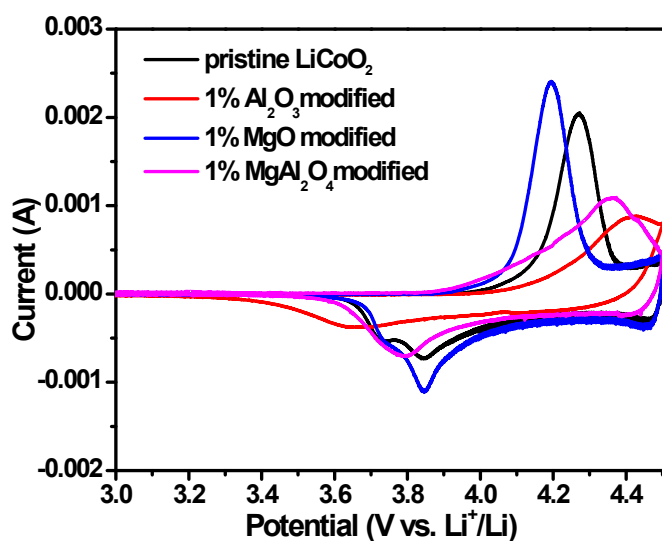

**Fig. S2** Initial Cyclic voltammograms (CVs) of the pristine  $\text{LiCoO}_2$  and  $\text{Al}_2\text{O}_3$ ,  $\text{MgO}$ ,  $\text{MgAl}_2\text{O}_4$ -modified  $\text{LiCoO}_2$  at  $0.1 \text{ mV s}^{-1}$  scan rate. CV tests of  $\text{Li}||\text{LiCoO}_2$  cells were performed over the potential range of 3.0~4.5 V at a scanning rate of  $0.1 \text{ mV s}^{-1}$  on a CHI 604D electrochemical workstation (Chenhua Instruments Co. Ltd).

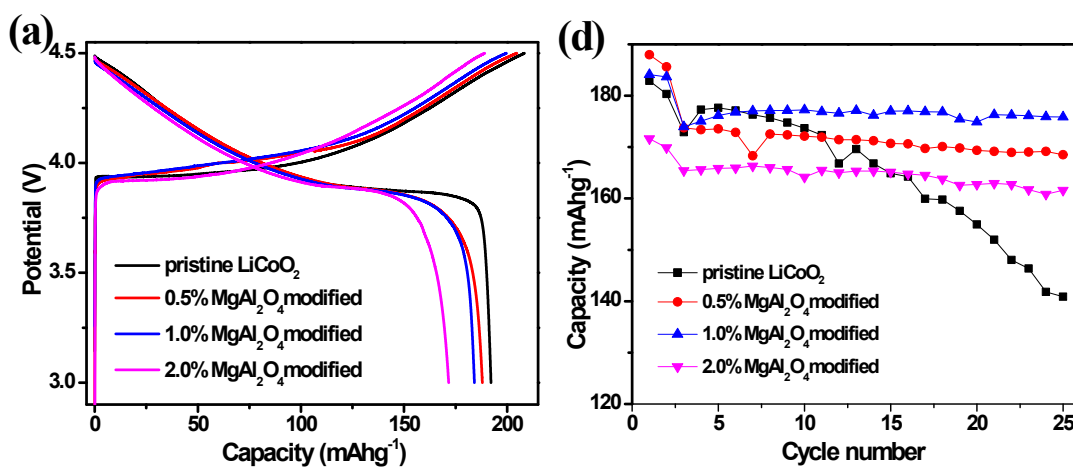

**Fig. S3** Charge-discharge curves (a) and cycling performance (b) of the pristine  $\text{LiCoO}_2$  and  $\text{MgAl}_2\text{O}_4$ -modified  $\text{LiCoO}_2$  samples with various compositions.
